# Supplementary material for: One-step solution synthesis of bismuth sulfide (Bi2S3) with various hierarchical architectures and their photoresponse properties
Source: Royal Society of Chemistry journal article supplement (doi:10.1039/c1ra00289a), 2011-11-03
Supplement: c1ra00289a.pdf [file c1ra00289a.pdf]

## Supplementary Information

### **One-step solution synthesis of bismuth sulfide (Bi<sub>2</sub>S<sub>3</sub>) with various hierarchical architectures and their photoresponse properties**

Guanjun Xiao,<sup>a</sup> Qingfeng Dong,<sup>b</sup> Yingnan Wang,<sup>a</sup> Yongming Sui,<sup>a</sup> Jiajia Ning,<sup>a</sup>  
Zhaoyang Liu,<sup>b</sup> Wenjing Tian,<sup>\*b</sup> Bingbing Liu,<sup>a</sup> Guangtian Zou<sup>a</sup> and Bo Zou<sup>\*a</sup>

*State Key Laboratory of Superhard Materials, Jilin University, Changchun 130012, China; and State Key Laboratory of Supramolecular Structure, Jilin University, Changchun 130012, China*

<sup>a</sup> State Key Laboratory of Superhard Materials, Jilin University

<sup>b</sup> State Key Laboratory of Supramolecular Structure and Materials, Jilin University

\* Corresponding authors. E-mails: [zoubo@jlu.edu.cn](mailto:zoubo@jlu.edu.cn); [wjtian@jlu.edu.cn](mailto:wjtian@jlu.edu.cn)

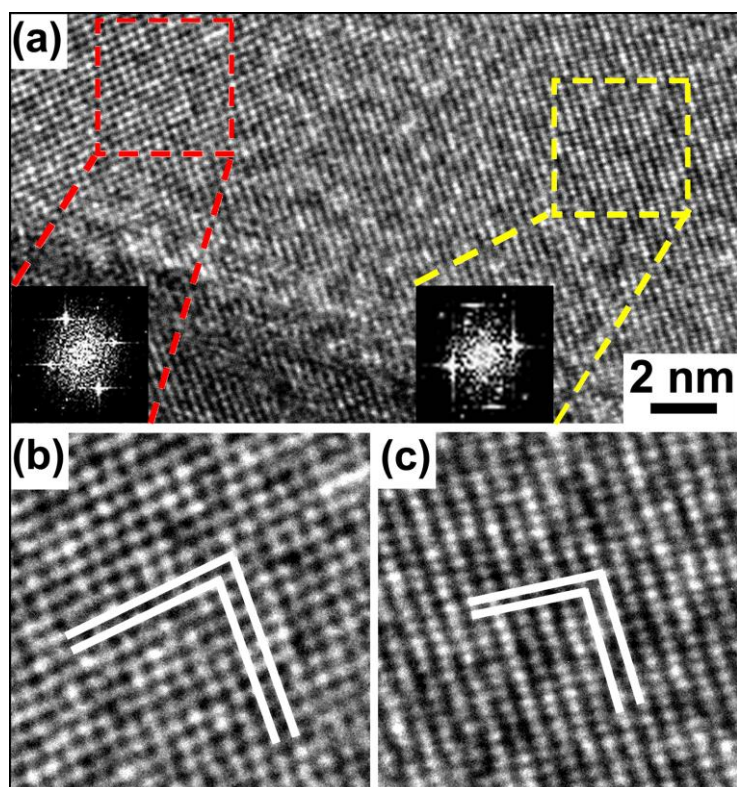

**Figure S1.** HRTEM image of near the node of individual sheaf-like  $\text{Bi}_2\text{S}_3$  MCs. (a) shows the overall HRTEM image. (b) and (c) depict the magnified images corresponding to the red and yellow dashed area, respectively. The insets are the corresponding FFT patterns.

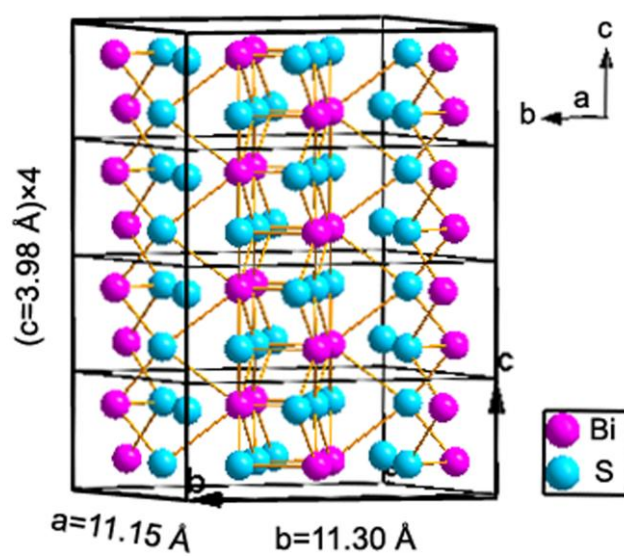

**Figure S2.** The unit cell prolong 4 times along  $c$ -axis marked with cell constants of orthorhombic  $\text{Bi}_2\text{S}_3$ .

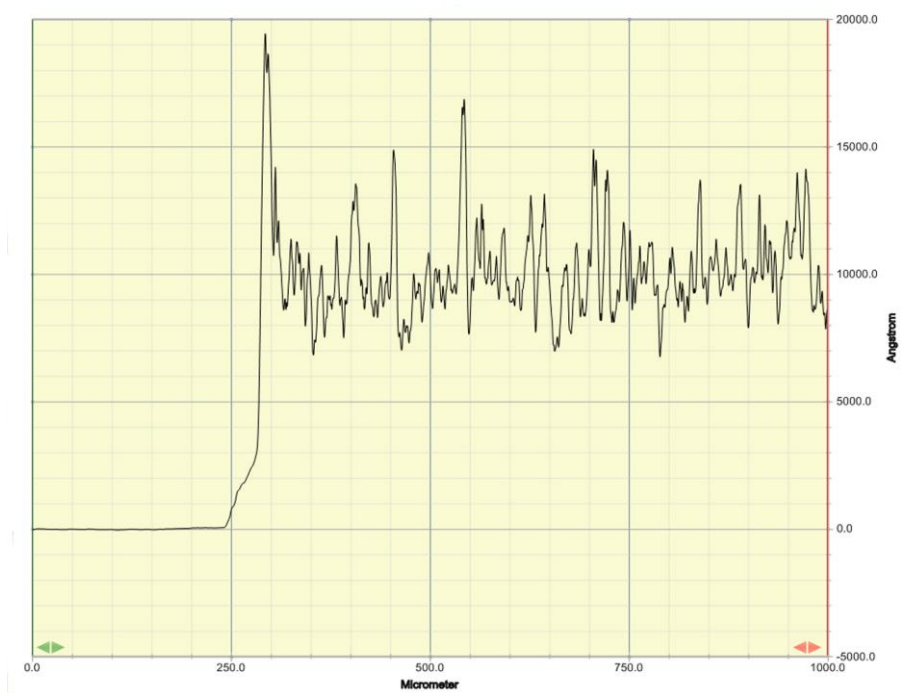

**Figure S3.** Thickness and surface roughness characterization of hierarchical  $\text{Bi}_2\text{S}_3$ -based film.
